# Supplementary material for: “Sheddable” PEG-lipid to balance the contradiction of PEGylation between long circulation and poor uptake
Source: Royal Society of Chemistry journal article supplement (doi:10.1039/c6nr02174c), 2016-01-01
Supplement: c6nr02174c1.pdf [file c6nr02174c1.pdf]

## Supplementary Information

### **“Sheddable” PEG-Lipid to Balance the Contradiction of PEGylation between Long Circulation and Poor Uptake**

Caiyan Zhao,<sup>‡a</sup> Hongzhang Deng,<sup>‡a,b</sup> Jing Xu,<sup>a</sup> Shuyi Li,<sup>a</sup> Lin Zhong,<sup>a</sup> Leihou Shao,<sup>a</sup>  
Yan Wu <sup>\*a</sup> and Xing-jie Liang<sup>\*a</sup>

<sup>a</sup>CAS Key Laboratory for Biomedical Effects of Nanomaterials and Nanosafety, CAS  
Center for Excellence in Nanoscience, National

Center for Nanoscience and Technology, Beijing 100190, P.R. China

<sup>b</sup>Department of Polymer Science and Technology and Key Laboratory of Systems  
Bioengineering of the Ministry of Education, School of Chemical Engineering and  
Technology, Tianjin University, Tianjin 300072, P.R.China

\* Corresponding author. Tel: +86 10 82545615 +86 10 82545614

E-mail address: [liangxj@nanoctr.cn](mailto:liangxj@nanoctr.cn); [wuy@nanoctr.cn](mailto:wuy@nanoctr.cn)

<sup>‡</sup>Caiyan Zhao and Hongzhang Deng contributed equally to this study.

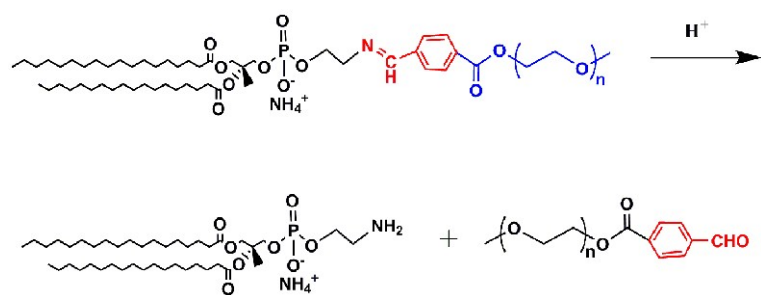

**Scheme S1** Hydrolysis route of DSPE-Hy-PEG copolymer at acidic condition.

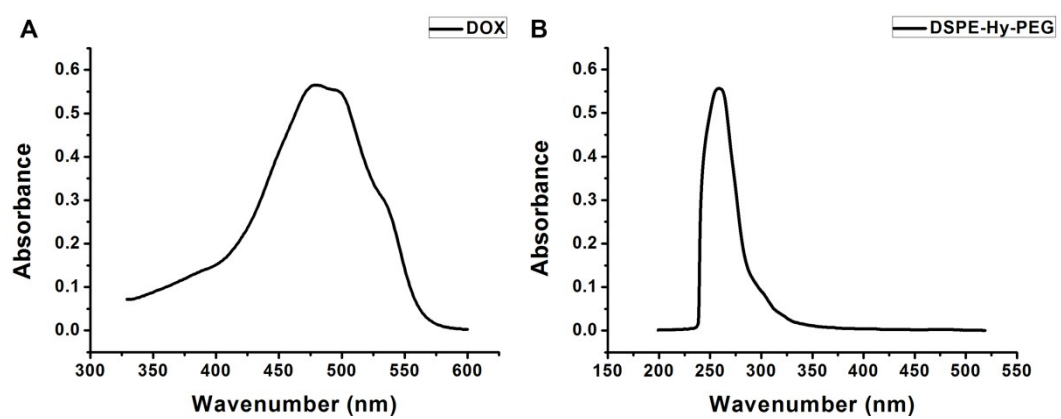

Fig. S1 (a) UV-vis absorption spectra of DOX; (b) UV-vis absorption spectra of DSPE-Hy-PEG.

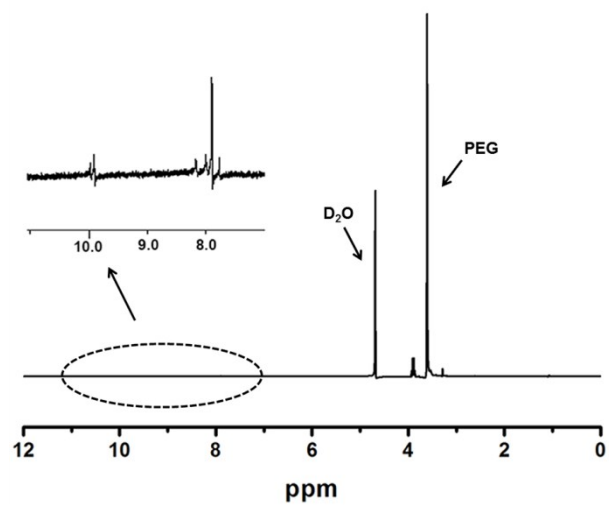

**Fig. S2**  $^1\text{H}$ NMR spectra of DSPE-Hy-PEG micelles incubated at pH 6.8 for 24 h.

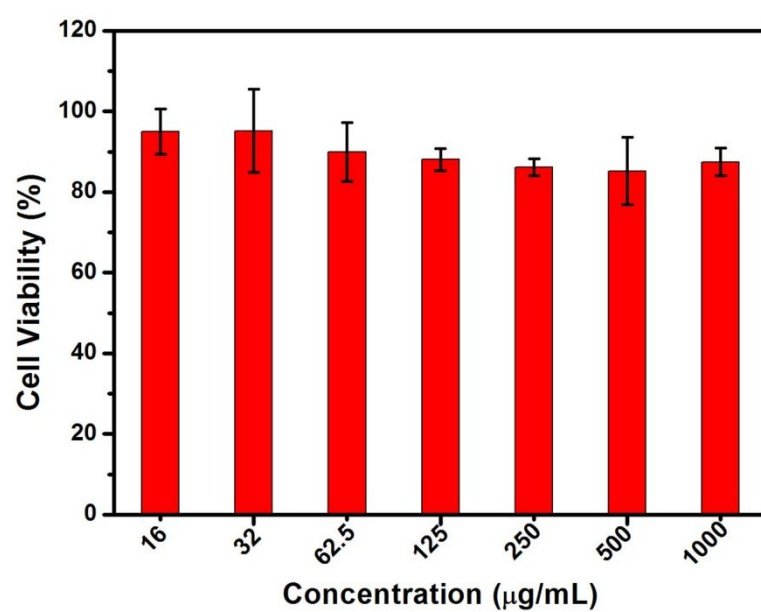

**Fig. S3** Viability of MCF-7 cells after incubation for 24 h with empty DSPE-Hy-PEG micelles at various concentrations.

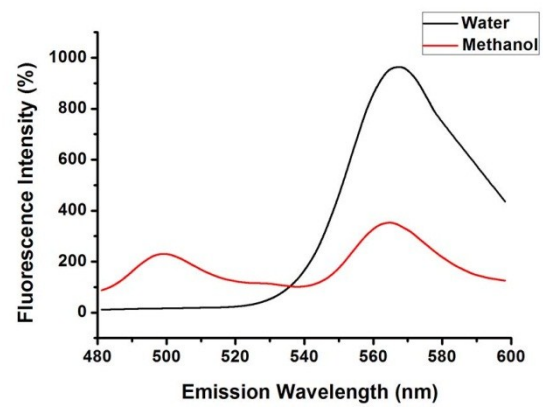

**Fig. S4** Emission spectra of DiO/DiI-loaded DSPE-Hy-PEG micelles diluted by water or methanol.

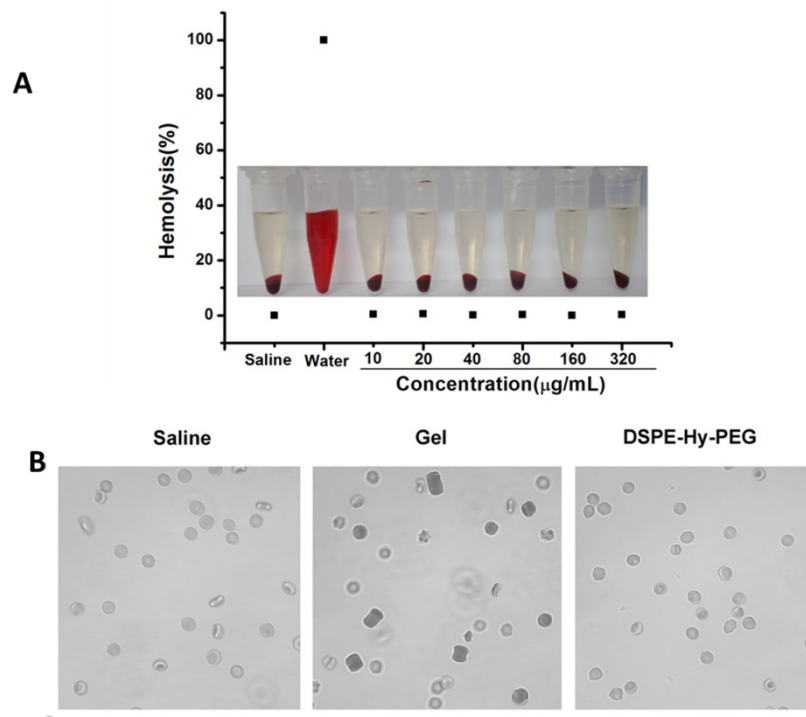

**Fig. S5** (A) Hemolysis assay of empty micelles, using water as a positive control and saline as a negative control; (B) CLSM images of Red blood cells incubated with empty micelles, using gel as a positive control and saline as a negative control.

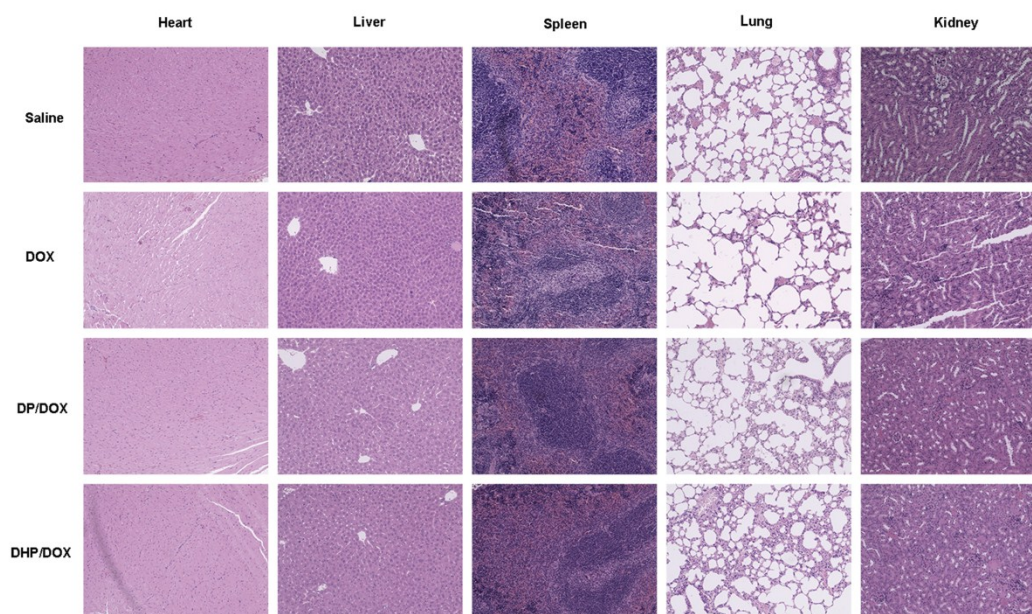

**Fig. S6** Representative H&E sections of various organs of tumor-bearing nude mice after treatment with various drug formulations (DSPE-PEG represented by DP, DSPE-Hy-PEG represented by DHP).
